# Supplementary material
Source: PubMed Central journal article supplement (PMC4623929)
Supplement: NIHMS723250-supplement-1.pdf [file NIHMS723250-supplement-1.pdf]

**Table 1 (supp): Circadian Rhythm Evaluation in 16 patients with Classic CAH**

| <b>Hormones</b>                        | 07:00h <sup>1</sup>          | 17:00h <sup>1</sup>          | Period <sup>2</sup><br>(h) <sup>3</sup> | Harmonics <sup>3</sup> | Rhythm<br>Detection <sup>3</sup> |
|----------------------------------------|------------------------------|------------------------------|-----------------------------------------|------------------------|----------------------------------|
| <b>ACTH (pmol/L)</b>                   | <b>12.8</b><br>(3.6 – 90.3)  | <b>6.3</b><br>(3.9 – 41.8)   | <b>23.9</b><br>(22.8 – 25.2)            | <b>2</b>               | <b>Yes</b>                       |
| <b>17-OHP (nmol/L)</b>                 | <b>65.2</b><br>(3.3 – 161.9) | <b>27.4</b><br>(4.1 – 152.9) | <b>26.4</b><br>(24.2 – 29.1)            | <b>1</b>               | <b>Yes</b>                       |
| <b>Androstenedione (nmol/L)</b>        | <b>6.5</b><br>(4.5 – 17.3)   | <b>9.1</b><br>(2.7 – 14.3)   | <b>24.8</b><br>(23.2 – 31.5)            | <b>1</b>               | <b>Yes</b>                       |
| <b>Androsterone (nmol/L)</b>           | <b>2.8</b><br>(1.7 – 7.7)    | <b>4.3</b><br>(2.7 – 9.1)    | <b>27.3</b><br>(24.5 – 30.6)            | <b>1</b>               | <b>Yes</b>                       |
| <b>DHEA (nmol/L)</b>                   | <b>1.8</b><br>(0.4 – 8.8)    | <b>1.2</b><br>(0.5 – 5.4)    |                                         |                        | <b>No</b>                        |
| <b>Testosterone (males) (nmol/L)</b>   | <b>16.6</b><br>(9.1 – 23.0)  | <b>10.5</b><br>(7.5 – 19.5)  | <b>27.6</b><br>(24.4 – 31.7)            | <b>1</b>               | <b>Yes</b>                       |
| <b>Testosterone (females) (nmol/L)</b> | <b>1.8</b><br>(0.7 – 3.1)    | <b>1.6</b><br>(1.1 – 3.0)    | <b>26.8</b><br>(22.9 – 32.3)            | <b>1</b>               | <b>Yes</b>                       |
| <b>Progesterone (males) (nmol/L)</b>   | <b>1.5</b><br>(0.2 – 4.5)    | <b>0.5</b><br>(0.1 – 4.1)    | <b>25.3</b><br>(21.3 – 30.3)            | <b>1</b>               | <b>Yes</b>                       |

|                                                |                                 |                                 |                                     |            |
|------------------------------------------------|---------------------------------|---------------------------------|-------------------------------------|------------|
| <b>Progesterone<br/>(females)<br/>(nmol/L)</b> | <b>2.0<br/>(0.1 –<br/>40.1)</b> | <b>1.8<br/>(0.5 –<br/>21.5)</b> | <b>28.4<br/>(25.0 – 1<br/>33.0)</b> | <b>Yes</b> |
|------------------------------------------------|---------------------------------|---------------------------------|-------------------------------------|------------|

---

<sup>1</sup> Median (IQR); <sup>2</sup> Mode (95% CI)

<sup>3</sup> one patient receiving morning dexamethasone was excluded from analysis
