# Supplementary material
Source: PubMed Central journal article supplement (PMC4623929)
Supplement: NIHMS723250-supplement-2.pdf [file NIHMS723250-supplement-2.pdf]

**Table 2a (supp): Target Monitoring Times Following Twice Daily Prednisone in 5 female patients with Classic CAH**

| Hormones        | Morning Dose                         |                                      | Evening Dose                         |                                      |
|-----------------|--------------------------------------|--------------------------------------|--------------------------------------|--------------------------------------|
|                 | T <sub>min</sub> <sup>1</sup><br>(h) | T <sub>max</sub> <sup>1</sup><br>(h) | T <sub>min</sub> <sup>1</sup><br>(h) | T <sub>max</sub> <sup>1</sup><br>(h) |
| ACTH            | 4.6 (1.7)                            | 9.2 (2.6)                            | 3.2 (1.6)                            | 11.2 (2.4)                           |
| 17OHP           | 5.0 (2.5)                            | 8.4 (3.2)                            | 4.4 (1.5)                            | 11.2 (1.9)                           |
| Androstenedione | 4.6 (2.4)                            | 7.8 (2.3)                            | 4.8 (2.4)                            | 9.6 (4.2)                            |
| Androsterone    | 7.0 (3.7)                            | 10.8 (3.6)                           | 5.2 (2.9)                            | 8.4 (3.2)                            |
| DHEA            | 1.2 (1.8)                            | 13 (2.2)                             | 0.2 (0.4)                            | 11.0 (2.2)                           |
| Testosterone    | 5.4 (4.9)                            | 11.0 (3.2)                           | 3.6 (1.5)                            | 11.4 (1.7)                           |
| Progesterone    | 4.6 (1.9)                            | 11.4 (2.4)                           | 5.2 (2.4)                            | 11.8 (1.5)                           |

<sup>1</sup> Mean (SD)

**Table 2b (supp): Target Monitoring Times Following Twice Daily Prednisone in 6 male patients with Classic CAH**

| Hormones        | Morning Dose                         |                                      | Evening Dose                         |                                      |
|-----------------|--------------------------------------|--------------------------------------|--------------------------------------|--------------------------------------|
|                 | T <sub>min</sub> <sup>1</sup><br>(h) | T <sub>max</sub> <sup>1</sup><br>(h) | T <sub>min</sub> <sup>1</sup><br>(h) | T <sub>max</sub> <sup>1</sup><br>(h) |
| ACTH            | 4.4 (1.0)                            | 12.5 (0.9)                           | 3.3 (1.6)                            | 10.6 (1.8)                           |
| 17OHP           | 4.4 (2.6)                            | 10.8 (3.7)                           | 5.3 (2.0)                            | 10.3 (2.2)                           |
| Androstenedione | 3.1 (2.0)                            | 11.2 (4.0)                           | 3.6 (2.0)                            | 10.3 (1.3)                           |
| Androsterone    | 7.7 (2.6)                            | 9.5 (3.0)                            | 3.2 (1.9)                            | 8.0 (4.2)                            |
| DHEA            | 5.3 (4.7)                            | 12.5 (0.9)                           | 4.3 (4.4)                            | 9.4 (2.0)                            |
| Testosterone    | 6.4 (4.3)                            | 11.8 (2.4)                           | 3.9 (1.3)                            | 10.7 (1.4)                           |
| Progesterone    | 3.4 (1.9)                            | 9.2 (3.8)                            | 3.0 (2.4)                            | 10.8 (2.4)                           |

<sup>1</sup> Mean (SD)
