# Supplementary material
Source: PubMed Central journal article supplement (PMC4623929)

Figure 1 (supps)

i)

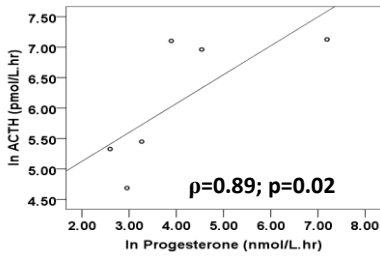

ii)

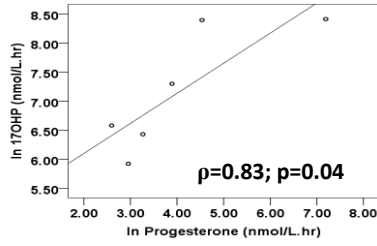

iii)

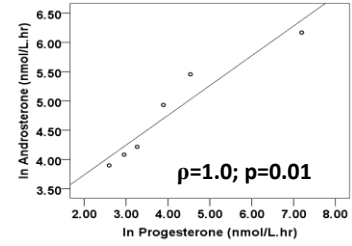

iv)

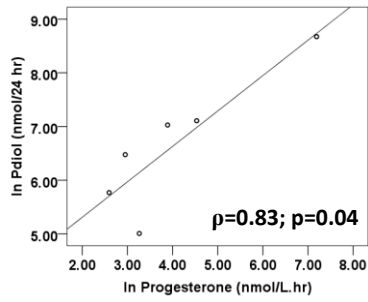

v)

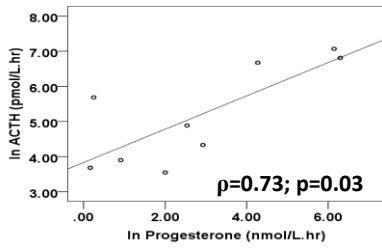

vi)

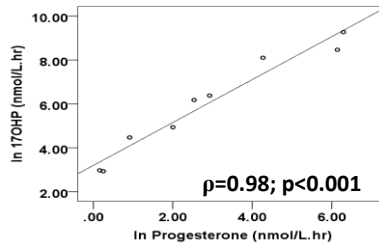

vii)

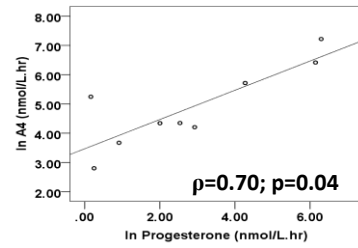

viii)

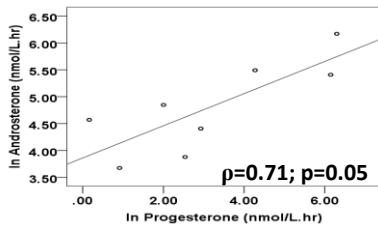

ix)

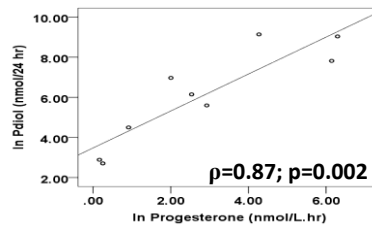

Supplement: NIHMS723250-supplement-3.pdf [file NIHMS723250-supplement-3.pdf]
